# Supplementary material
Source: publisher figshare collection journal article supplement (https://gsapubs.figshare.com/ndownloader/files/23907245)
Supplement: Supplementary file 1 [file 23907245]

## Sheet: Table DR2.1
Table S2.1 - Pb isotopic composition of K-feldspar.
Well/ Location	Stratigraphic Unit	Sample depth (top) m below RT	Grain Reference	206Pb/204Pb	2σ	207Pb/204Pb	2σ	208Pb/204Pb	2σ
Modern River Sands
HNF-6 , NW Gander River			F2	18.2355	0.029224	15.6519	0.024912	38.0906	0.06239
			F3	18.2068	0.047154	15.6573	0.041364	38.1202	0.1008
			F4	18.2197	0.009122	15.6413	0.007814	38.0825	0.018942
			F5	18.1576	0.007432	15.6109	0.006468	37.9993	0.015948
			F6	18.2215	0.00805	15.6323	0.00697	38.0762	0.017084
			F8	18.1509	0.009344	15.6381	0.00835	38.0294	0.02016
HNF-12, Main River			F1	18.2736	0.05737	15.5491	0.049628	37.2242	0.118608
			F2	17.8383	0.021114	15.5057	0.018658	37.4665	0.045446
			F3	18.5876	0.037404	15.6351	0.031814	38.3462	0.078456
			F4	17.6435	0.039462	15.482	0.034826	37.7288	0.08526
			F5	17.8214	0.02878	15.5552	0.02541	37.1877	0.061146
			F6	17.4424	0.034712	15.497	0.028616	36.5251	0.19649
			F7	17.8388	0.02802	15.5623	0.024586	37.2171	0.05902
			F8	17.4421	0.013466	15.5004	0.01212	36.5417	0.02881
			F9	17.5281	0.039276	15.4586	0.034822	37.4331	0.085874
			F10	17.7172	0.093834	15.5151	0.082044	37.1827	0.197846
			F11	17.2665	0.02297	15.4354	0.020588	36.6983	0.04974
			F12	17.9658	0.023496	15.5199	0.02008	37.6831	0.04884
			F13	17.0607	0.022552	15.4439	0.020572	36.5668	0.049346
			F14	17.5595	0.038988	15.5069	0.034414	36.7493	0.082214
			F15	18.4488	0.039132	15.6147	0.033556	37.0188	0.080094
			F16	17.8085	0.028256	15.5429	0.024618	36.7046	0.058556
			F17	17.4825	0.026296	15.4989	0.023404	37.0332	0.056348
			F18	17.821	0.067524	15.6698	0.059682	37.2516	0.14382
			F19	19.2284	0.070294	15.7064	0.057578	39.0046	0.144288
			F20	18.0715	0.029268	15.5401	0.025272	37.8265	0.061716
			F21	17.6333	0.02193	15.523	0.019098	36.8506	0.045948
			F22	17.3582	0.050224	15.4376	0.044764	36.4446	0.10744
			F23	17.2641	0.01973	15.4754	0.017728	36.5214	0.042052
			F24	17.0755	0.028252	15.4333	0.025936	36.6709	0.062034
			F25	16.828	0.033146	15.4105	0.030544	36.201	0.072
			F26	17.793	0.02864	15.5727	0.02512	37.0012	0.060588
			F27	17.8445	0.039612	15.5449	0.034812	36.8082	0.082886
			F28	17.6902	0.017774	15.5062	0.015392	37.0797	0.037672
			F29	17.8657	0.048994	15.5308	0.04286	37.4507	0.104814
			F30	17.8363	0.020356	15.4913	0.017836	37.5947	0.043296
HNF-8, Debert River			F1	18.551	0.021306	15.6251	0.015816	38.3874	0.041898
			F2	18.2935	0.016044	15.6247	0.013706	38.0534	0.033876
			F3	18.3404	0.024548	15.6475	0.021386	38.1339	0.05191
			F4	18.1821	0.072392	15.6343	0.063968	37.8949	0.155814
			F5	18.3248	0.031592	15.6209	0.027402	38.0871	0.06727
			F6	18.524	0.039276	15.6335	0.032462	38.3276	0.08133
			F8	18.5023	0.038408	15.634	0.032324	38.2659	0.080726
			F9	18.2668	0.059256	15.5904	0.046478	38.0267	0.11732
			F10	18.2353	0.025464	15.5822	0.021806	37.7851	0.05316
			F11	17.928	0.037722	15.5359	0.031478	37.5767	0.077926
Offshore Wells
Western Basin
Mohawk B-93	Roseway Formation	1648.97	F1	17.5433	0.0285822	15.4592	0.0239649	38.1577	0.0603848
			F2	16.7682	0.0320567	15.3675	0.0271282	38.2874	0.0687092
			F3	18.7931	0.0716912	15.6497	0.0616199	38.8102	0.151208
			F5	19.5481	0.0407474	15.7086	0.0182467	38.9808	0.0473454
			F6	19.4658	0.0137676	15.7465	0.0107874	39.0599	0.0273246
			F7	18.8835	0.0218573	15.6369	0.0168996	38.5596	0.0415662
			F8	19.2343	0.0251323	15.6588	0.015254	38.7415	0.0362192
			F9	18.7925	0.00404037	15.6323	0.00366054	38.5984	0.00914448
			F10	19.2566	0.0193026	15.7325	0.0126634	38.9862	0.0328935
			F11	18.8106	0.0133396	15.6943	0.0106054	38.7388	0.0259633
			F12	18.5428	0.0495447	15.6344	0.0308301	38.5849	0.0779287
			F13	19.4168	0.0396492	15.8916	0.032592	39.3632	0.0811977
			F18	19.3658	0.0177252	15.7338	0.0142681	39.0042	0.0354221
			F19	19.7015	0.0240639	15.7366	0.016586	39.1078	0.0420555
			F20	19.4269	0.0150123	15.7348	0.012185	39.0375	0.0302184
			F21	18.6357	0.0720118	15.5762	0.0522545	38.5002	0.132143
			F23	17.3469	0.0464048	15.4319	0.0372394	37.9548	0.0921912
			F24	19.361	0.0231979	15.7617	0.0185476	39.0432	0.046117
			F25	19.0427	0.0160492	15.6965	0.0109153	38.8112	0.0274791
			F27	19.6329	0.0753684	15.8777	0.0607758	39.4342	0.153173
			F28	19.3843	0.0179708	15.8356	0.0167506	39.2317	0.0396157
			F29	16.9644	0.0258673	15.3913	0.0183894	38.1464	0.0458379
			F30	19.2836	0.0277791	15.7128	0.0231069	38.9139	0.0570727
			F31	19.4746	0.0144084	15.7452	0.0117397	39.0729	0.0292771
			F32	19.1085	0.0606862	15.6273	0.0489909	38.7722	0.122978
			F33	18.7826	0.0215807	15.6897	0.0124159	38.5034	0.0329937
			F34	19.4733	0.012361	15.7361	0.0102996	39.0463	0.0252764
			F35	19.3754	0.0396866	16.0055	0.0329431	39.6254	0.0812026
			F37	17.9799	0.0498378	15.6274	0.0390057	38.6004	0.0978521
			F38	19.1111	0.015097	15.6978	0.0122114	38.8518	0.0305182
			F39	19.3133	0.0246418	15.7404	0.0189121	39.0048	0.0476116
			F40	19.2944	0.031772	15.6937	0.0248805	38.9058	0.0618871
			F42	17.5514	0.0359991	15.4208	0.0281515	37.8046	0.0698804
			F43	17.4884	0.0439755	15.4361	0.0349457	37.8896	0.0867397
			F44	17.8272	0.0632447	15.4416	0.0365166	38.0174	0.0927488
			F45	19.15	0.0246847	15.6764	0.0192204	38.7944	0.0480376
			F46	19.396	0.0136873	15.7221	0.0111401	39.0028	0.0275258
			F49	19.6531	0.0301456	15.7485	0.0241781	39.1313	0.0608302
			F50?	19.1173	0.0307954	15.8128	0.0225653	39.1238	0.0575521
			F52	17.8344	0.0466508	15.4372	0.0277299	38.0451	0.0694533
			F54	19.3611	0.00443364	15.6967	0.00349631	38.9073	0.00901188
			F55	19.0306	0.0703212	15.4485	0.0570463	38.3059	0.142965
			F58	19.0448	0.0514626	15.701	0.0407591	38.8339	0.102934
			F60	19.2655	0.0201561	15.6982	0.0154976	38.879	0.0378969
Mohawk B-93	Mohawk	1755.65	F1	17.0685	0.0248279	15.3372	0.0133046	37.6534	0.0327784
			F2	17.9888	0.0595065	15.498	0.0150465	38.0756	0.0428873
			F3	17.4142	0.0417835	15.4113	0.0214912	38.0564	0.052006
			F4	18.846	0.0179202	15.7307	0.0144632	38.7552	0.0362078
			F5	18.7353	0.00685047	15.661	0.00785891	38.6027	0.0155796
			F6	17.8549	0.0598179	15.5295	0.0163242	38.041	0.0484665
			F7	19.0804	0.0443311	15.9582	0.0375285	39.3064	0.0925924
			F8	18.7878	0.0493219	15.7759	0.0427916	38.8452	0.106542
			F9	17.6943	0.0257227	15.4865	0.0122403	38.0388	0.0300507
			F10	18.0599	0.0488455	15.5545	0.0223829	38.1296	0.0534424
			F11	18.7167	0.0143008	15.7012	0.0103217	38.6745	0.0219461
			F12	17.5885	0.0110014	15.4418	0.00962572	37.8402	0.0235384
			F13	18.3781	0.0367104	15.5652	0.0301055	38.0431	0.0754844
			F15	16.5864	0.0204833	15.3167	0.0131223	38.1799	0.0327521
			F16	17.0862	0.00404348	15.5057	0.00419307	36.96	0.00918094
			F17	18.6658	0.0241889	15.6411	0.0195299	38.4543	0.0484522
			F18	18.2356	0.0782881	15.4261	0.0545236	37.8456	0.145016
			F19	17.7769	0.0289212	15.4846	0.0182976	37.827	0.0472069
			F20	18.0565	0.0670113	15.5829	0.0179203	38.4435	0.0472242
			F21	18.9071	0.0413247	15.8127	0.0367656	38.9442	0.0919451
			F22	17.2784	0.0435999	15.3616	0.0369951	37.816	0.0915959
			F23	19.1954	0.0275491	16.0001	0.0214717	39.4115	0.0527797
			F24	17.2	0.0249704	15.4074	0.0201306	37.8189	0.0496016
			F25	17.2761	0.0627582	15.4666	0.0495245	38.0021	0.122002
			F28	18.9031	0.060936	15.9156	0.0515925	39.0323	0.128204
			F29	17.5	0.0141145	15.4374	0.0106265	37.802	0.0256902
			F30	18.6626	0.0234328	15.6111	0.0117786	38.5053	0.0494447
			F31	17.3695	0.0207549	15.4256	0.0186925	37.8152	0.0463172
			F34	17.5784	0.0480341	15.5467	0.0317678	37.9439	0.0795107
			F35	17.5816	0.0492345	15.5469	0.0323884	37.9455	0.0812233
			F36	17.2462	0.0248991	15.404	0.0213921	38.0649	0.0529209
			F37	20.2161	0.0837137	16.7558	0.068658	41.3116	0.173452
			F38	19.8938	0.0638001	16.6216	0.0528715	40.9472	0.132118
			F39	18.8322	0.0727449	15.6397	0.0537779	38.5332	0.137146
			F42	19.5519	0.0357967	16.2482	0.0292695	40.0582	0.0727652
			F46	18.7609	0.0566848	15.6953	0.0440089	40.9786	0.204642
			F48	17.3634	0.0439318	15.3793	0.0364667	37.6371	0.0909395
			F49	19.573	0.043916	16.3106	0.0371842	40.2086	0.0919315
			F50	18.9432	0.00292585	15.7545	0.0037726	38.8915	0.00670163
			F51	16.9757	0.0267435	15.3183	0.0230735	37.5987	0.0570775
			F52	17.5333	0.0182618	15.4618	0.0144112	38.1221	0.0354051
			F53	16.8251	0.0219228	15.3473	0.0197983	38.1307	0.0499326
			F54	17.2784	0.0152786	15.4122	0.0137987	38.0315	0.0330822
			F55	19.7507	0.0466135	16.2953	0.0358836	40.2567	0.0914003
			F56	17.4852	0.0199623	15.4606	0.0150767	37.8425	0.0367072
			F57	17.3205	0.0228778	15.4046	0.0202649	37.9151	0.049996
			F58	17.2981	0.0180828	15.4243	0.0158615	37.713	0.0394681
			F60	18.0496	0.0224293	15.553	0.0122444	38.2448	0.0307228
Mohawk B-93	Mohawk	1932.43	F1	19.342	0.02289	16.1575	0.0196115	39.8184	0.0515657
			F3	20.2519	0.0336324	16.8874	0.0282982	41.6339	0.0690825
			F4	18.5012	0.0258482	15.8014	0.012708	38.9008	0.0310833
			F6	18.9421	0.0302969	15.9081	0.0325416	39.0918	0.0818006
			F7	19.2902	0.0224322	16.1238	0.0183784	39.7163	0.0459262
			F8	17.6764	0.0135558	15.4864	0.0117555	37.8489	0.0290414
			F10	18.8498	0.0319816	15.9544	0.0178261	39.2333	0.0478805
			F11	19.0853	0.0119292	15.9451	0.00995565	39.286	0.0241588
			F13	16.7188	0.010306	15.3365	0.00891907	38.1277	0.021881
			F14	19.5436	0.027596	16.4084	0.019671	40.5168	0.0509744
			F15	17.275	0.0390054	15.4422	0.0237319	38.0615	0.0564933
			F17	17.2513	0.00658571	15.3952	0.00626076	37.6844	0.014784
			F18	18.8775	0.0149276	15.774	0.0113836	38.8395	0.0280831
			F19	17.5336	0.0267214	15.4749	0.0190513	37.7485	0.0475205
			F20	18.7104	0.0111029	15.7098	0.00856224	38.6427	0.0212083
			F22	17.3092	0.0168649	15.504	0.00469099	37.0833	0.0273078
			F23	18.5019	0.0361294	15.7112	0.0268964	38.4806	0.0654974
			F24	18.1226	0.0330458	15.5892	0.0194062	38.2769	0.0494007
			F26	16.8461	0.0234573	15.3418	0.0216624	37.5943	0.0525397
			F27	18.795	0.0198053	15.6025	0.0134744	38.3569	0.0336289
			F28	17.5069	0.0231	15.4808	0.0171601	38.2048	0.0416598
			F29	17.282	0.0172901	15.4248	0.0145395	37.6509	0.0362435
			F31	17.1998	0.020231	15.3794	0.0170045	37.6756	0.0422844
			F32	17.0311	0.0107145	15.3557	0.00902472	37.6283	0.0223584
			F33	17.4363	0.0238289	15.4369	0.0153978	37.8043	0.0381527
			F35	20.7458	0.0396387	17.3562	0.0343823	42.8092	0.0861749
			F36	17.5833	0.0469667	15.4803	0.0305912	38.1731	0.0713162
			F38	18.5287	0.0185086	15.6861	0.0164992	38.4159	0.0403712
			F39	17.2249	0.0218606	15.5292	0.00818529	36.8297	0.0322273
			F40	17.7682	0.0481201	15.4421	0.0338484	38.0001	0.0841619
			F41	18.9241	0.0125379	15.8348	0.0112405	39.0206	0.0290893
			F43	19.0075	0.0257347	15.8886	0.0208098	39.1088	0.0515654
			F44	17.346	0.0124139	15.4137	0.00993991	37.8382	0.0244276
			F45	18.8838	0.0224354	15.8061	0.0213151	38.9071	0.0507942
			F46	18.7332	0.0251942	15.827	0.0254097	38.7935	0.0566311
			F47	17.7942	0.0387412	15.4307	0.0212784	37.8358	0.0566293
			F49	18.3977	0.0286893	15.6801	0.0201685	38.2405	0.0511854
			F50	18.969	0.0241235	15.8838	0.0195421	39.1097	0.0496074
			F51	18.3149	0.0177137	15.6091	0.0147886	37.9626	0.0361146
			F52	18.833	0.0160015	15.7572	0.014308	38.8053	0.0363033
			F53	19.0091	0.0239496	15.9358	0.0194577	39.2468	0.0507012
			F55	18.7836	0.0091947	15.664	0.00658607	38.6414	0.0173367
			F56	17.1094	0.0120697	15.3725	0.0101788	37.7564	0.0252706
			F58	17.5372	0.0299465	15.4637	0.01745	37.8654	0.0435809
			F59	18.9351	0.0296759	15.8552	0.024605	39.0641	0.0620977
Mohican I-100	Upper Missisauga	2203.7	F1	16.2819	0.0292932	15.3602	0.0151567	35.8679	0.0457804
			F2	18.118	0.024727	15.5964	0.0149721	37.9503	0.0408864
			F3	17.1747	0.0225232	15.4676	0.012061	36.4978	0.0689729
			F4	17.6962	0.0101742	15.6927	0.00947013	37.7054	0.02227
			F5	17.5367	0.0338487	15.4656	0.0310524	37.3499	0.0688193
			F6	17.7936	0.0247292	15.5444	0.013101	37.5486	0.0375353
			F7	15.6803	0.071705	15.1764	0.0496238	35.1419	0.126482
			F8	17.1371	0.0147802	15.4428	0.0067017	36.7068	0.0265123
			F9	16.9771	0.0330756	15.4313	0.0203635	36.6438	0.0560045
			F10	18.3277	0.0164547	15.589	0.0117867	37.9625	0.0301369
			F11	17.0117	0.0716803	15.4552	0.0414751	36.8634	0.106107
			F13	16.6458	0.0744439	15.3575	0.0279513	36.237	0.101423
			F14	16.3856	0.0870148	15.2849	0.040396	36.093	0.118921
			F15	17.2135	0.0195116	15.461	0.0157704	36.7199	0.0425096
			F16	17.2546	0.0214383	15.5145	0.0175158	36.9194	0.0454639
			F17	17.2653	0.0246225	15.4934	0.0197582	36.7219	0.0563871
			F18	17.4915	0.00547391	15.5106	0.00324888	37.2533	0.0086548
			F19	17.3675	0.0108364	15.4787	0.00973457	37.0613	0.0230342
			F20	17.3475	0.0185913	15.4833	0.0136805	37.0647	0.0353771
			F21	17.9607	0.0299362	15.5599	0.0196287	37.7303	0.0535045
			P22	17.6704	0.0669734	15.4925	0.0589718	37.4099	0.143857
			F24	17.338	0.00398971	15.5147	0.00375136	37.0977	0.00855007
			F25	17.4123	0.0232953	15.4982	0.0124199	37.1401	0.0358994
			F26	17.4353	0.0126583	15.5413	0.0112089	37.2393	0.0269203
			F27	17.5462	0.00718216	15.5114	0.0046688	37.298	0.0125639
			F28	16.8682	0.0237867	15.3857	0.0178642	36.6999	0.0439111
			F29	18.2184	0.0234297	15.6794	0.0174729	38.2288	0.0450678
			F30	14.7325	0.0305136	14.9264	0.0176744	34.3558	0.046822
			F31	17.3785	0.0419829	15.3961	0.0381704	36.4651	0.104634
			F32	16.3569	0.0419214	15.3527	0.0299118	35.8877	0.0758981
			F33	18.1468	0.0411	15.6761	0.0296156	38.1204	0.0736332
			F34	17.2936	0.0188954	15.4625	0.0163726	36.8564	0.0412979
			F35	17.0908	0.0406079	15.4796	0.0373713	36.6881	0.0880634
			F38	17.4074	0.00920718	15.518	0.00847854	37.1792	0.0199411
			F39	17.2752	0.0374148	15.4589	0.0215919	37.2402	0.0582188
			F40	17.7666	0.035483	15.5827	0.018279	38.844	0.136806
			F41	16.5529	0.0714212	15.3439	0.0343516	35.9534	0.101853
			F42	17.6012	0.0215218	15.5304	0.011509	36.9704	0.0280783
			F43	18.5543	0.0550978	15.6157	0.0407198	38.3273	0.104051
			F44	17.2811	0.0023867	15.4902	0.00229656	37.0197	0.00511399
			F45	17.2254	0.0144727	15.443	0.0122213	36.7192	0.0291409
			F46	17.1543	0.0270478	15.4962	0.023631	36.9391	0.0564986
			F47	17.7115	0.0416136	15.5435	0.0357787	36.6613	0.0867696
			F48	17.9862	0.0262117	15.5641	0.012386	38.3751	0.0571276
			F49	17.3738	0.00173025	15.4896	0.00189813	37.1165	0.00406539
			F50	17.2875	0.00208436	15.4946	0.0024476	37.0328	0.00416451
			F51	19.0683	0.0503743	15.7076	0.034733	38.7715	0.0886169
			F52	17.7144	0.0217458	15.5399	0.0107345	37.4643	0.0319138
			F53	17.4364	0.0175803	15.5036	0.0159954	36.8184	0.0405147
			F54	17.3052	0.0221909	15.4516	0.0198737	36.6623	0.0476127
			F55	16.6141	0.0322004	15.347	0.0238728	36.0273	0.0635669
			F56	17.3048	0.0066667	15.4858	0.00429783	37.0536	0.011541
			F57	15.6945	0.0502052	15.1935	0.040945	35.0739	0.0993902
Mohican I-100	Roseway	2685.29	P1	18.7447	0.0260555	15.5797	0.0205277	38.5848	0.0518563
			F2	18.2837	0.00666808	15.5974	0.00594497	38.0292	0.014069
			F4	18.2589	0.0302701	15.5342	0.0255716	37.8307	0.0634546
			F5	18.3193	0.0618342	15.6522	0.0530883	38.1129	0.130236
			F6	18.2535	0.0859769	15.567	0.0733832	38.1287	0.181778
			F7	18.1998	0.0995402	15.4962	0.0869145	37.798	0.212736
			F10	18.4253	0.0610452	15.6726	0.0527912	38.2302	0.130018
			F12	18.2702	0.0337932	15.5929	0.0295449	38.0734	0.0714071
			F13	18.3506	0.0407159	15.569	0.0343049	37.9749	0.0844444
			P14	18.1811	0.0823379	15.5514	0.0703503	38.0125	0.173338
			F15	18.1626	0.0163895	15.5831	0.0142176	38.1417	0.0350224
			F16	18.1949	0.0268287	15.5286	0.0210939	38.0462	0.0520266
Mohican I-100	Roseway	2688.34	F1	18.0734	0.0515622	15.6079	0.0446854	38.2024	0.110921
			F2	18.3705	0.0121308	15.5832	0.0102115	37.9869	0.0248105
			F3	18.0548	0.0513492	15.5689	0.0422879	37.9691	0.104142
			F4	18.3289	0.0347455	15.6332	0.0291172	38.1704	0.073931
			F5	18.2825	0.0124334	15.5721	0.0105423	37.9694	0.0257835
			F7	18.3371	0.013807	15.5851	0.0117563	38.0196	0.0291422
			F8	17.8377	0.0296847	15.5664	0.0204886	37.8115	0.0578269
			F9	17.1378	0.0154721	15.4483	0.0156528	36.8027	0.0354917
Mohican I-100	Abenaki	3474.72	P1	17.0941	0.0167287	15.475	0.0152239	36.8174	0.0364239
			P2	18.1018	0.0387608	15.6	0.030449	38.0056	0.0761966
			P3	17.63	0.0551313	15.4228	0.0490062	37.354	0.118338
			P7	18.3205	0.0652544	15.4821	0.0542051	37.9285	0.135393
			P8	18.1308	0.0702133	15.4362	0.0589375	37.7077	0.145175
			P9	18.5842	0.0795686	15.4094	0.221675	38.2578	0.151159
			P10	18.3876	0.0826482	15.5581	0.0705169	38.234	0.169921
			P11	17.7613	0.0340502	15.4552	0.0296384	37.6753	0.0733895
			P12	18.2407	0.0353673	15.4962	0.0316391	37.9725	0.0721007
			P13	18.6225	0.0707057	15.4671	0.0607464	37.9608	0.149341
Mohican I-100	Iroquois	3852.67	F1	19.1004	0.0148246	15.6783	0.0122693	38.741	0.0302101
			F2	19.1813	0.0427295	15.6811	0.0327145	38.6645	0.0818033
			F3	18.8625	0.0560484	15.5755	0.0506568	38.3692	0.118372
			F4	19.3901	0.0207061	15.7055	0.0168818	38.8357	0.0419617
			F5	19.3816	0.0183606	15.7432	0.0150796	38.9622	0.0373754
			F7	19.3098	0.0130477	15.7193	0.0106004	38.8909	0.0262443
			F8	19.1123	0.0147443	15.7091	0.0122266	38.9501	0.0305794
			F9	17.6583	0.033334	15.5165	0.0282549	38.1547	0.0701602
			F10	19.3575	0.0221954	15.7416	0.0178882	38.9069	0.0445715
			F11	19.1474	0.0209239	15.7147	0.0174868	38.9407	0.0432779
			F12	20.0687	0.0697629	15.8353	0.0538324	40.0167	0.139382
			F13	18.9066	0.0122712	15.651	0.0097113	38.7792	0.0245111
			F14	19.3809	0.0249343	15.7257	0.0203732	38.8896	0.0508743
			F15	19.3721	0.0463246	15.6975	0.0372279	38.8288	0.0933076
			F16	19.0994	0.0168443	15.7059	0.0136808	38.9587	0.0342802
			F17	19.379	0.0164742	15.7404	0.0134817	38.9406	0.0333678
			F18	19.1082	0.0241	15.6837	0.0197177	38.7707	0.0490499
			F19	19.0874	0.0221921	15.6961	0.0175608	38.9022	0.0444001
			F20	18.2193	0.00543577	15.6266	0.00508628	38.1451	0.0115341
			F21	19.2711	0.0333976	15.6482	0.0273659	38.7054	0.0680206
			F22	19.2253	0.0253573	15.6888	0.0207225	38.7285	0.0516899
			F23	19.2722	0.0179848	15.6846	0.015032	38.8164	0.0370846
			F24	19.4004	0.0209667	15.7373	0.0169951	38.9072	0.0421682
			F26	19.2806	0.0694637	15.7519	0.057201	39.0256	0.14346
			F27	18.9079	0.0186963	15.6493	0.0153328	38.9096	0.0384474
			F28	19.1286	0.0255522	15.6791	0.0209571	38.8299	0.0520599
			F29	19.3591	0.0291419	15.7131	0.0240589	38.8762	0.0598233
			F30	19.3803	0.0223276	15.7421	0.0182607	38.9453	0.0460525
			F31	17.9756	0.0456322	15.5555	0.036206	37.9766	0.0914848
			F32	19.6523	0.0284003	15.7897	0.0230435	39.4037	0.058321
			F33	19.0452	0.0270955	15.6668	0.0225895	38.8795	0.0567697
			F34	19.3946	0.042536	15.7231	0.0348578	38.8921	0.0862982
			F35	19.9902	0.0416664	15.8056	0.0319995	39.7787	0.0823168
			F36	19.5862	0.0432011	15.8267	0.0343891	39.0229	0.0851187
			F37	19.0284	0.0274266	15.6377	0.0226009	38.7745	0.05661
			F38	19.2536	0.0333442	15.7359	0.0271893	38.8075	0.0681793
			F39	19.3391	0.0153168	15.7079	0.0123581	38.8561	0.0307348
			F40	19.0624	0.0199114	15.7043	0.0167089	38.9481	0.0415351
			F41	19.069	0.0199505	15.6676	0.0160647	38.8478	0.040544
			F42	19.0788	0.0253071	15.6861	0.0204189	38.8254	0.0515917
			F43	18.9529	0.0665682	15.6124	0.052342	38.5818	0.132654
			F44	19.4745	0.0587737	15.7768	0.047829	39.079	0.119484
			F45	19.3027	0.0225512	15.6981	0.0181849	38.8291	0.0452588
			F47	19.139	0.0238066	15.6841	0.0188731	38.8698	0.0477235
			F48	19.8285	0.05969	15.6959	0.0490544	39.1562	0.118955
			F50	19.285	0.0484073	15.7688	0.033357	39.0369	0.0868419
			F51	19.058	0.0297573	15.6718	0.0243808	38.6614	0.0607377
			F52	19.613	0.0307213	15.7511	0.0249775	39.0599	0.0626014
			F53	19.3141	0.0297488	15.6776	0.0244164	38.7462	0.0603189
			F54	18.6058	0.013693	15.6107	0.0115256	38.4029	0.0288118
			F55	19.0264	0.0304466	15.6581	0.0253563	38.7285	0.0625672
			F56	18.7049	0.0253252	15.636	0.0211609	38.5146	0.0529069
			F57	19.3968	0.0349538	15.6939	0.0286498	38.8196	0.0709579
			F59	19.5397	0.0157774	15.7856	0.0129247	39.196	0.0321299
			F58	19.211	0.0179447	15.6743	0.0146731	38.7691	0.0365905
			F61	18.9912	0.0242959	15.6703	0.0203041	38.8728	0.0509109
			P1	19.0732	0.0169517	15.6715	0.0139219	38.7476	0.0348115
			P2	19.3017	0.119532	15.9994	0.099972	39.4523	0.248612
			P37	19.0076	0.107752	15.58	0.0887989	38.7838	0.223415
Mohican I-100	Iroquois	3855.72	F1	19.1017	0.0853575	15.7117	0.0724016	38.6694	0.175292
			F2	17.2874	0.00933792	15.4618	0.00673698	37.024	0.0170053
			F3	19.3694	0.0121799	15.7037	0.00984613	38.8112	0.023794
			F4	19.3495	0.0102913	15.7041	0.0086011	38.8359	0.0208554
			F5	18.8157	0.0142577	15.5967	0.0117626	38.4275	0.0284495
			F6	19.3067	0.0228759	15.6942	0.0194786	38.7703	0.0471484
			F7	19.382	0.0188307	15.713	0.0150611	38.8651	0.0379541
			F8	19.2783	0.0131583	15.6676	0.0108954	38.7005	0.0267583
			F9	19.3317	0.0170761	15.7032	0.0148086	38.8554	0.0361323
			F10	19.1909	0.0102855	15.6825	0.00860074	38.8111	0.0212554
			F11	19.3542	0.0107551	15.7076	0.00926661	38.8223	0.0219417
			F12	19.1494	0.0135617	15.6936	0.0111029	38.8501	0.0275613
			F13	18.6403	0.0226391	15.5882	0.017868	38.4039	0.0451842
			F14	19.6516	0.0444544	15.65	0.0395747	38.8924	0.0913996
			F15	19.4541	0.0328839	15.7543	0.0270692	38.9288	0.0670349
			F16	19.3943	0.0146385	15.7055	0.0115147	38.8403	0.028567
			F17	19.4203	0.013814	15.7162	0.0113319	38.852	0.0279942
			F18	19.3584	0.0178662	15.6972	0.0142657	38.8295	0.0355342
			F19	19.2184	0.0376408	15.7256	0.0225139	38.8621	0.0581744
			F20	19.5754	0.0235955	15.7559	0.0157564	39.0333	0.0395608
			F21	19.3865	0.0167511	15.7281	0.0133511	38.9032	0.0335564
			F22	19.1725	0.0174355	15.6924	0.0142462	38.8143	0.0354186
			F23	19.326	0.02035	15.6906	0.0163793	38.7686	0.0410832
			F24	19.5072	0.0168885	15.7337	0.0137069	38.9008	0.0346118
			F25	19.9537	0.0199397	15.8219	0.0157377	39.2199	0.0386811
			F26	19.0623	0.0242511	15.6826	0.0196274	38.774	0.0492694
			F27	18.9367	0.042875	15.6622	0.0337649	38.4364	0.0841987
			F28	19.4196	0.0302667	15.6705	0.0246134	38.791	0.0601414
			P29	18.1389	0.0692043	15.7059	0.0608668	38.2171	0.149009
			P30	18.0195	0.036096	15.5689	0.029912	37.859	0.0738873
			F31	19.3197	0.0218964	15.7009	0.0166225	38.7875	0.0413316
			F32	19.2706	0.0116132	15.7178	0.00822056	38.779	0.0204334
			F33	19.4426	0.0163328	15.7286	0.012619	38.9178	0.0319255
			F35	17.6712	0.0220758	15.538	0.0124022	37.6004	0.0651632
			F36	19.0138	0.039434	15.7089	0.0300896	38.728	0.0759929
			F37	19.1324	0.0302752	15.6928	0.0175715	38.7872	0.0486625
			F38	19.3139	0.0191918	15.7325	0.0153622	38.8747	0.0389415
			F39	19.2532	0.0128854	15.7047	0.0107024	38.8472	0.0263957
			F40	19.8866	0.0326763	15.8114	0.025073	39.5384	0.0639397
			F41	19.4439	0.0164899	15.7309	0.0134405	38.8962	0.0332959
			F42	18.6765	0.0162273	15.6274	0.0135023	38.459	0.0337282
			F43	19.2958	0.0364464	15.7324	0.0241943	38.9237	0.0629629
			F44	19.4862	0.0154412	15.7509	0.0119464	39.1236	0.0295361
			F45	19.3997	0.0225865	15.7261	0.0182627	38.8768	0.0455595
			F46	19.3474	0.0161795	15.7045	0.0131866	38.8365	0.032809
			F47	19.1366	0.015675	15.6815	0.0142772	38.8366	0.0326404
			F49	19.4442	0.0156176	15.7485	0.0125797	38.9508	0.0314088
			F50	19.4847	0.0232412	15.7348	0.0189006	38.9076	0.0469884
Central Basin
MicMac H-86	Marmura Member	1070.74-2000.12	F1	18.3275	0.0103516	15.612	0.00890364	38.1179	0.0219509
		*Combination of 2 samples	F2	19.1426	0.032112	15.6958	0.0259967	38.7903	0.0653107
			F3	19.4041	0.0255784	15.7167	0.0207732	38.8967	0.054527
			F3	16.6673	0.0279886	15.3381	0.0239138	36.1273	0.0580113
			F4	17.034	0.0402623	15.3256	0.0358283	36.249	0.086286
			F6	18.2839	0.074257	15.5994	0.06007	38.1936	0.150569
			F8	18.2775	0.0516885	15.5735	0.0442466	38.0723	0.109773
			F9	22.0681	0.0413027	16.0998	0.0308211	38.8942	0.0736441
			F10	18.2536	0.0760274	15.5871	0.0648085	38.0961	0.157945
			F11	17.6507	0.0532143	15.4535	0.0383828	36.1875	0.0939431
			F12	17.7746	0.0903685	15.4731	0.0777628	36.7796	0.187348
			F17	16.9177	0.096417	15.498	0.090673	36.5148	0.209506
			F18	16.944	0.0741074	15.4128	0.0684168	35.9793	0.157175
			F20	16.0549	0.101649	15.0849	0.0453356	35.5484	0.12239
			F21	16.9333	0.078672	15.2734	0.0716318	35.5005	0.164131
			F22	16.2873	0.032136	15.2959	0.0304281	35.8549	0.0714677
			F23	15.7202	0.0351858	15.1849	0.0327677	35.2102	0.0774188
			F24	16.3637	0.0605951	15.2652	0.0548193	35.6597	0.12959
			F27	17.0512	0.0499891	15.4421	0.0458674	36.4453	0.108567
			F28	16.6385	0.0523393	15.3622	0.0475335	36.0149	0.113217
			F32	15.6843	0.0488724	15.1841	0.0459838	35.1189	0.109249
			F33	16.7766	0.0231485	15.3473	0.0193133	36.1541	0.046014
			F36	15.2358	0.0561239	15.016	0.0550285	34.5335	0.12647
			F35	16.0257	0.0584367	15.2615	0.0556204	35.6904	0.130758
			F40	16.3388	0.0256037	15.2752	0.0241479	36.3192	0.057576
			F41	17.0279	0.0618464	15.4496	0.0561191	36.3726	0.135474
			F43	16.3601	0.091298	15.2432	0.0848335	36.123	0.201127
			F45	16.5879	0.0509666	15.4272	0.0450586	36.3102	0.10811
			F46	18.0035	0.0725146	15.594	0.0622993	37.5809	0.153192
			F47	16.8815	0.0429067	15.3677	0.0387295	36.3419	0.0933397
			F48	16.8932	0.0672208	15.2482	0.0618773	36.1861	0.14626
			F49	18.7893	0.0704464	15.6758	0.0596416	39.0678	0.150574
			F51	17.2813	0.0791773	15.4585	0.0653034	36.7673	0.160173
			F54	18.2322	0.0545629	15.5986	0.0471413	38.0033	0.115245
			F55	16.2353	0.0443095	15.2854	0.0415949	35.6624	0.0972702
			F56	16.4154	0.0535369	15.2438	0.0505161	36.6781	0.122348
			F57	17.391	0.0371747	15.4875	0.0327436	36.2711	0.0778189
			F58	16.2402	0.0425505	15.282	0.0406472	35.9838	0.0959993
			F60	15.6559	0.0955622	15.0875	0.0899121	35.0659	0.214517
Cohasset A-52	Upper Cree	2130.04	F1	15.6577	0.00595152	15.2415	0.00528316	35.0894	0.0122841
			F2	15.702	0.0137539	15.212	0.00812005	35.0856	0.0216613
			F3	17.4657	0.00704087	15.4687	0.00607706	36.5095	0.0146854
			F4	15.5521	0.0279	15.1936	0.0120679	34.9858	0.035827
			F6	18.278	0.0162416	15.5809	0.0102313	38.0222	0.0249697
			F7	16.104	0.0490761	15.2487	0.0317972	35.4984	0.0829677
			F8	17.6263	0.00958756	15.4975	0.00851647	36.6533	0.0212788
			F9	15.9242	0.00614617	15.2316	0.00585658	35.6534	0.013364
			F10	19.7663	0.00863476	15.7875	0.00626707	36.647	0.0144965
			F11	18.3475	0.0135453	15.5598	0.00472786	38.1054	0.0114612
			F12	15.4317	0.0179715	15.1308	0.0110502	34.8584	0.0288208
			F13	16.9192	0.00652839	15.359	0.0049154	36.3093	0.0122305
			F14	16.3256	0.00939883	15.2732	0.00689855	35.6263	0.0147311
			F15	16.9749	0.00552513	15.3047	0.00331258	37.6474	0.00804616
			F16	15.638	0.00775832	15.2025	0.00674392	35.0345	0.0160858
			F17	15.4846	0.0251717	15.0934	0.0132329	34.9259	0.0376185
			F18	16.7982	0.00474326	15.3403	0.0045222	36.1725	0.0104255
			F19	16.188	0.00504908	15.2638	0.00431878	35.413	0.00938299
			F20	18.1525	0.00848107	15.545	0.00586731	37.9686	0.0128473
			F21	16.1122	0.00421177	15.2595	0.00423156	39.0909	0.0102064
			F22	16.6352	0.00408301	15.3035	0.00435064	35.8179	0.0117338
			F23	16.3672	0.00478654	15.2772	0.00467871	35.7128	0.0106398
			F24	17.0773	0.0430785	15.3683	0.0233419	37.4308	0.063027
			F25	18.8553	0.0464916	15.5804	0.0202576	38.0807	0.0477988
			F26	18.2677	0.0094252	15.5636	0.00824107	38.0177	0.019835
			F27	15.6015	0.0169567	15.1314	0.0130858	34.9358	0.0332933
			F28	18.2458	0.0205523	15.4821	0.0137968	37.638	0.0357822
			F29	15.6187	0.0263386	15.1403	0.0116122	35.0198	0.0359567
			F30	19.514	0.0057081	15.8088	0.00492508	39.0295	0.0116253
			F31	18.4173	0.00541534	15.5608	0.0047486	38.0186	0.0114528
			F32	17.1527	0.0175523	15.3417	0.0136794	36.4586	0.0325836
			F33	16.5793	0.0178468	15.347	0.0108184	36.299	0.0285692
			F34	18.1919	0.0025424	15.5561	0.0027543	37.9954	0.00590615
			F35	18.3027	0.0154848	15.5544	0.012733	38.0029	0.0311606
			F36	16.9348	0.0267891	15.3611	0.0168493	36.6821	0.0437294
			F37	18.1858	0.00627238	15.5262	0.00531048	37.9327	0.0114682
			F38	18.0788	0.0162947	15.4436	0.0133648	37.4164	0.0330071
			F39	17.1153	0.00452843	15.3973	0.00413309	36.5223	0.00971668
			F40	18.2712	0.00631108	15.5463	0.00562514	37.9363	0.0130544
			F41	18.2332	0.0154043	15.5394	0.0125168	37.9831	0.0306478
			F42	16.6938	0.063131	15.3384	0.0338705	36.3696	0.0897761
			F43	18.2181	0.00824728	15.5797	0.0070994	38.0475	0.0166055
			F44	17.1751	0.0067196	15.424	0.00617521	37.1319	0.0143448
			F45	18.2413	0.00388408	15.5986	0.00339312	38.0498	0.00803415
			F46	15.7402	0.0310805	15.2246	0.0210845	35.2219	0.0497982
			F47	17.465	0.00344972	15.4565	0.00307229	38.0585	0.00732166
			F48	18.2959	0.00746157	15.6076	0.00576759	38.0965	0.0141019
			F49	18.24	0.0040801	15.6041	0.00407982	38.0548	0.00951343
			F50	18.3105	0.00365371	15.6112	0.00332946	38.108	0.00718654
Alma K-85	Upper Missisauga	2469.08	F1	16.7055	0.0212612	15.3902	0.0185391	36.1819	0.044801
			F2	15.7825	0.0343143	15.2276	0.0318086	35.2435	0.0751882
			F3	17.2889	0.037502	15.5376	0.0339618	36.7254	0.0813307
			F4	16.2369	0.0201606	15.2785	0.0190042	36.0235	0.0450911
			F5	16.018	0.017221	15.2741	0.0165375	35.5343	0.0383818
			F7	18.0479	0.092532	15.5291	0.0785503	37.8519	0.191706
			F8	13.965	0.0209677	14.5969	0.0217979	34.6492	0.0527564
			F9	17.1027	0.0357967	15.46	0.0326435	36.6038	0.0779041
			F11	15.8679	0.0263929	15.2396	0.0240588	35.4086	0.0571499
			F13	16.2171	0.0328787	15.3558	0.0310196	35.4131	0.0719773
			F15	17.7489	0.0396184	15.4586	0.0343072	37.2634	0.0845374
			F16	17.0923	0.0727505	15.2733	0.0658057	36.994	0.161429
			F18	17.3002	0.0231308	15.5074	0.0207265	37.0482	0.0499884
			F19	15.9705	0.0167024	15.2756	0.015982	36.0112	0.038255
			F20	15.6794	0.0160869	15.2263	0.0158415	35.1313	0.036885
			F21	16.6583	0.0719727	15.3506	0.0660755	36.1809	0.155745
			F23	18.159	0.0294235	15.6025	0.0254381	38.1271	0.0628016
			F24	15.8637	0.0632405	15.2901	0.0576865	35.4288	0.136975
Thebaud I-93	Middle Missisauga	3080.38	F1	18.4076	0.0158805	15.6368	0.0135376	38.2049	0.0335334
			F2	18.2726	0.0320456	15.6102	0.0273859	38.0664	0.0679115
			F3	18.1086	0.0627689	15.5747	0.0539974	38.0441	0.133954
			F4	14.5549	0.0754278	14.9747	0.0645486	34.3343	0.155855
			F5	15.8769	0.051282	15.2876	0.0496076	35.6995	0.117288
			F6	16.2634	0.0601789	15.3254	0.0542436	35.9278	0.129352
			F8	16.8956	0.036455	15.3663	0.0332107	35.9172	0.0801211
			F9	15.4413	0.0461241	15.1641	0.0454068	34.977	0.105276
			F10	17.1891	0.101915	15.3927	0.0773577	36.7365	0.195221
			F11	18.3576	0.0451878	15.5663	0.0385372	38.0959	0.0952945
			F12	18.2207	0.052437	15.5914	0.0447471	37.9834	0.111099
			F13	17.945	0.0609053	15.5155	0.0532383	37.6041	0.129577
			F15	18.1249	0.066489	15.4618	0.0555264	37.6849	0.139416
			F16	14.5783	0.0110892	14.9396	0.0112125	34.5462	0.0260051
			F18	15.9959	0.096452	15.2099	0.0767881	35.4944	0.18654
			F19	17.3665	0.0800418	15.4457	0.0724609	36.9141	0.173494
			F20	18.0706	0.0493073	15.637	0.0435592	37.6944	0.105815
			F21	18.2928	0.0212385	15.5938	0.0181674	38.0449	0.0450436
			F22	16.8876	0.0527937	15.38	0.0469132	36.539	0.122985
			F23	18.1064	0.0689398	15.5535	0.0595823	37.7511	0.145965
			F24	18.4037	0.053548	15.6437	0.0462246	38.2238	0.11297
			F25	18.0192	0.0776613	15.4624	0.066566	37.7295	0.165251
			F27	16.0014	0.0296886	15.2493	0.0280769	35.5162	0.0662458
			F28	18.256	0.0146111	15.5877	0.0125417	38.0176	0.0310306
			F30	18.1211	0.0113911	15.5127	0.00974465	37.8175	0.0238478
			F31	18.2354	0.0385068	15.5855	0.0330823	38.028	0.0814511
			F35	18.3921	0.0302225	15.5848	0.0252481	38.0543	0.0629584
			F37	16.9741	0.0252197	15.4114	0.0220544	36.4028	0.0536036
			F40	18.2629	0.0263142	15.5614	0.0224461	37.9808	0.0555818
Glenelg E-58	Upper Missisauga	3709.78	F1	14.6832	0.0462231	14.844	0.04294	34.6602	0.102804
			F3	15.4202	0.0500425	15.111	0.0474441	34.925	0.111584
			F4	16.6425	0.0472012	15.3255	0.0434835	36.0065	0.103813
			F6	18.302	0.0219702	15.643	0.0189017	38.1702	0.046604
			F8	16.7495	0.037865	15.4404	0.0349958	36.4803	0.083749
			F10	17.0986	0.0260579	15.4179	0.0188022	36.4531	0.0489666
			F11	17.4876	0.096914	15.4778	0.0781102	36.8617	0.19914
Glenelg N-49	Upper Missisauga	3462.9	F2	16.7678	0.0230025	15.377	0.0176681	36.3513	0.0442292
			F3	18.2825	0.0237324	15.6094	0.0200453	38.0884	0.0495735
			F4	17.1775	0.0468473	15.4336	0.0363764	36.2382	0.093066
			F5	16.8678	0.0342626	15.3935	0.0159623	36.4767	0.0515619
			F6	16.4954	0.0173337	15.3434	0.0164281	36.5322	0.0390544
			F7	17.4032	0.0183538	15.52	0.0134336	36.9458	0.0349762
			F9	15.7959	0.0524946	15.2175	0.0414647	35.357	0.103523
			F10	16.0271	0.0172984	15.3259	0.016145	35.318	0.0383212
			F12	17.1795	0.0271486	15.458	0.0244232	36.3884	0.0581492
			F14	18.2541	0.0286325	15.6277	0.0239922	37.9273	0.0589192
			F15	17.1974	0.0463136	15.4715	0.0416508	36.6077	0.0994815
			F16	16.5832	0.0302753	15.3964	0.0240306	36.6066	0.0602363
			F17	16.4809	0.0325397	15.3402	0.0286011	35.891	0.0696861
			F19	15.7386	0.0353994	15.1902	0.0234337	35.2038	0.0621369
			F20	18.2961	0.0314609	15.6353	0.0263034	38.1434	0.0645103
			F21	17.1219	0.0453259	15.3982	0.0396135	36.6227	0.0959874
			F22	15.5726	0.0139965	15.186	0.0135142	35.0508	0.0318715
			F23	16.6002	0.0483356	15.2997	0.0419732	36.1365	0.101535
			F25	17.218	0.0654629	15.4477	0.058589	36.7361	0.141409
			F27	16.0739	0.0337126	15.2445	0.032469	35.8595	0.0769654
			F29	20.3629	0.0425388	15.8545	0.0336934	38.1311	0.0807972
North Triumph G-43	Upper Missisauga	3283.3	F1	17.7348	0.0600164	15.5298	0.0517366	37.0671	0.125154
			F2	17.0242	0.0244484	15.4341	0.0224427	36.4575	0.0532706
			F3A	18.4734	0.0743125	15.703	0.0636041	38.3902	0.157645
			F3B	18.3986	0.0328352	15.6125	0.0278591	38.1384	0.0693158
			F4	18.2572	0.0170436	15.6609	0.0148179	37.9225	0.0362198
			F5	16.7341	0.049568	15.4261	0.0466398	36.1547	0.109297
			F6	15.5576	0.050311	15.21	0.0479524	35.1225	0.113157
			F7	18.3077	0.0341635	15.6288	0.0297259	38.1105	0.0727085
			F8	16.0356	0.0556526	15.3017	0.0472133	35.5452	0.114198
Eastern Basin
Peskowesk A-99	Lower Cree	2228.82	F1	15.7092	0.0352974	15.1694	0.0335147	35.2019	0.0787077
			F2	16.8734	0.0266771	15.3739	0.024338	36.1183	0.0575591
			F3	17.1031	0.0462726	15.4213	0.0420592	36.4399	0.0987739
			F4	18.1665	0.0275578	15.675	0.0238638	37.1498	0.0576592
			F5	17.145	0.0338903	15.4161	0.0309967	36.6563	0.0733151
			F6	16.2067	0.0183529	15.2872	0.0173079	35.9579	0.0410758
			F8	18.3154	0.0336728	15.6315	0.028644	38.1601	0.0701511
			F10	17.3685	0.068306	15.3853	0.0596756	36.6567	0.144151
			F11	15.935	0.0581855	15.3039	0.0536521	35.4507	0.127409
			F13	17.4716	0.0255543	15.4884	0.0226481	36.5974	0.0539976
			F14	17.1119	0.0264856	15.4418	0.0239991	36.529	0.0575369
			F15	16.5057	0.0411261	15.4256	0.0386683	35.9854	0.0904371
			F16	15.6736	0.0316111	15.2532	0.0311521	35.1659	0.0728464
			F17	15.7189	0.0715147	15.1878	0.0677423	35.062	0.158499
			F18	15.7251	0.0380403	15.2564	0.0367269	35.229	0.0853065
			F19	16.1978	0.0293173	15.2594	0.0275788	35.7997	0.0655946
			F20	18.3443	0.0462806	15.5627	0.0398011	37.964	0.0976876
			F21	17.4835	0.0412021	15.4349	0.036699	37.402	0.0894314
			F26	17.9482	0.0451303	15.6419	0.0397104	37.7355	0.0962304
			F27	17.0345	0.0518291	15.44	0.0470418	36.5331	0.112557
			F28	17.2358	0.0378013	15.4442	0.0338641	36.3422	0.080897
			F29	16.3781	0.0501595	15.3595	0.0469093	36.0842	0.111865
			F30	14.6593	0.0295909	14.8537	0.018042	34.3684	0.0417071
			F31	17.482	0.013401	15.4924	0.0119519	36.5033	0.0282801
			F32	20.0876	0.0347893	15.9021	0.0261165	36.2173	0.0624172
Peskowesk A-99	Middle Missisauga	2952.75	F1	18.232	0.0128583	15.633	0.0110322	38.0995	0.0272494
			F2	18.5812	0.0213259	15.6014	0.0178263	38.333	0.043397
			F3	16.3282	0.0540078	15.325	0.0191435	35.7839	0.0700789
			F4	18.4731	0.0221949	15.6323	0.017017	38.2952	0.0426494
			F5	19.7443	0.0506425	15.7876	0.0403929	37.6056	0.0962533
			F6	18.1167	0.0132606	15.5084	0.0106309	37.776	0.0270012
			F7	18.2542	0.0178417	15.5702	0.0151553	37.9368	0.0372633
			F8	16.5798	0.0486322	15.4503	0.0424904	37.3209	0.102237
			F9	18.1848	0.0421604	15.5765	0.0283588	37.8217	0.0738981
			F10	18.3947	0.0197877	15.6148	0.0170219	38.1572	0.0414903
			F11	17.2266	0.04449	15.446	0.0163022	37.267	0.0482627
			F12	17.0882	0.0169933	15.4273	0.0121175	36.4808	0.0312299
			F13	18.3709	0.0170132	15.5758	0.0136016	38.0874	0.0340373
			F14	18.6769	0.0510404	15.6111	0.0417889	38.3366	0.0994478
			F15	15.9633	0.0244749	15.261	0.0168935	35.432	0.0439485
			F16	15.8563	0.014864	15.2364	0.0137621	35.2776	0.0323219
			F17	18.3254	0.0427528	15.5379	0.0341667	37.8406	0.0879806
			F19	18.1257	0.00918358	15.566	0.00629279	37.8839	0.0151388
			F20	18.4783	0.023047	15.5797	0.0178579	38.1629	0.0454118
			F21	16.9657	0.0205775	15.3887	0.0136429	36.7709	0.034804
			F23	16.7447	0.01058	15.3622	0.00978938	36.2075	0.0229494
			F24	18.2535	0.00738644	15.5751	0.00648714	38.0005	0.0155851
			F25	18.4507	0.0268298	15.5598	0.0224167	38.0931	0.0546635
			F26	17.4881	0.0513419	15.4623	0.0151285	37.0006	0.0667041
			F27	18.2578	0.0315166	15.5677	0.0269614	37.9943	0.0667045
			F28	18.3828	0.0111116	15.6136	0.00962113	38.1355	0.0235178
			F29	18.534	0.0258309	15.6148	0.0220866	38.2826	0.0572734
			F30	18.3102	0.0161556	15.5416	0.0111458	37.9297	0.0292498
			F31	18.2732	0.0101135	15.5978	0.00946378	38.0265	0.0219395
			F32	16.603	0.0527293	15.4449	0.0492288	36.4411	0.116983
			F33	16.1314	0.0217147	15.2997	0.0168416	35.5992	0.041433
			F34	18.5558	0.0146835	15.5817	0.0117334	38.2297	0.0282698
			F35	16.7207	0.0107957	15.3518	0.00963243	36.0808	0.022879
			F36	18.5565	0.0242655	15.5767	0.0204178	38.2129	0.0502286
			F37	18.5195	0.0149111	15.5755	0.0129354	38.1905	0.0314529
			F38	15.4781	0.0263188	15.119	0.0217875	34.9239	0.0526185
			F39	17.3813	0.022642	15.4264	0.019904	36.795	0.0482587
			F41	15.665	0.0425786	15.1503	0.0369359	35.0909	0.0893009
			F42	18.1302	0.0380465	15.5193	0.0169281	37.7665	0.0556898
			F43	19.6733	0.0393721	15.7022	0.0296871	40.1937	0.0816486
			F44	18.4412	0.0401903	15.6943	0.0424727	38.2621	0.0911336
			F45	16.5498	0.0240239	15.348	0.022442	36.0464	0.0526984
			F46	18.7435	0.0250554	15.6215	0.0183182	38.5781	0.0511338
			F47	18.2555	0.0140398	15.5137	0.0116838	37.5605	0.0302166
			F51	17.4852	0.0335964	15.4383	0.0156435	36.6823	0.0539073
			F50	18.3598	0.0245905	15.5622	0.0197846	38.0211	0.0497441
			F48	18.1224	0.0361701	15.4975	0.0308337	37.5884	0.0737444
			F52	18.3753	0.0157938	15.5551	0.00932193	38.0318	0.0247625
			F53	16.7325	0.0228842	15.379	0.0198668	36.2597	0.0481542
			F54	18.3408	0.0194387	15.6148	0.0164778	38.1332	0.0404133
			F55	18.3019	0.0231114	15.5605	0.0197005	37.9915	0.0482761
			F56	17.1566	0.0157393	15.4681	0.0142572	36.5254	0.0338556
			F57	16.8113	0.0340463	15.3225	0.0181835	36.4945	0.0494771
			F58	18.347	0.0204873	15.5839	0.0165761	38.0237	0.0417148
			F59	18.3863	0.0140148	15.5709	0.0112971	38.0772	0.0280137
			F60	17.7607	0.0444552	15.4587	0.0332787	37.2283	0.084632
Esperanto K-78	Middle Missisauga	2578.6	F5	18.6683	0.0659672	15.7246	0.0547643	38.7561	0.13865
			F17	15.4787	0.00938564	15.154	0.00686766	34.9341	0.0170178
			F18	18.0916	0.0861482	15.4283	0.0767733	37.5829	0.184836
			F20	18.2162	0.0842419	15.5763	0.0742372	38.0409	0.179398
			F22	16.1676	0.0892287	15.2883	0.0621805	35.7618	0.158507
			F23	18.3585	0.0927746	15.5134	0.0811346	38.096	0.194833
			F24	18.433	0.0380006	15.6293	0.0280873	38.174	0.069032
			F29	17.4583	0.0836122	15.4159	0.054768	36.6087	0.138602
			F31	19.0123	0.0624472	15.5645	0.0490916	38.1381	0.12112
			F32	18.3124	0.0150469	15.5963	0.0121127	38.0531	0.0294128
			F33	18.1573	0.0139075	15.5578	0.0118062	37.8687	0.0287325
			F35	17.8576	0.0263317	15.4794	0.021604	37.6592	0.0555284
			F36	18.4278	0.0270598	15.585	0.0217934	38.0616	0.0539249
			F37	18.2422	0.0315887	15.5699	0.0269743	38.0069	0.0646232
			F38	18.3887	0.0338684	15.5663	0.0354511	38.2662	0.0947691
			F40	18.5919	0.0787712	15.7733	0.0687642	38.4492	0.170088
			F44	18.3633	0.050389	15.6369	0.0408687	38.0673	0.0982411
			F45	16.2217	0.0098489	15.2904	0.00933154	35.8353	0.0219391
			F46	18.2127	0.00930257	15.5812	0.00807703	38.0205	0.0196455
Dauntless D-35	Upper Missisauga	3166.1	F2	18.2147	0.0982691	15.6853	0.0854688	39.0063	0.213752
			F3	17.6114	0.0236954	15.5663	0.0211684	37.2147	0.0511973
			F4	17.0872	0.0219307	15.4953	0.0201124	36.5635	0.0478092
			F5	15.6014	0.0273775	15.2765	0.0270196	35.2707	0.0627513
			F6	16.5308	0.0486154	15.3918	0.0445128	36.184	0.105827
			F7	15.9908	0.0207824	15.2977	0.0200906	36.354	0.0481435
			F8	15.9272	0.0218555	15.2191	0.0213088	36.1189	0.0515257
			F9	17.3828	0.0326417	15.3672	0.0209298	36.7252	0.0705277
			F10	15.22	0.0415717	14.946	0.0411884	34.3619	0.0959776
			F11	15.3304	0.0450409	15.0476	0.0430048	34.6039	0.100977
			F12	18.468	0.0269272	15.5502	0.0227341	37.9609	0.0564379
			F13	16.329	0.0168127	15.3034	0.0159153	36.0188	0.0376526
			F14	18.2702	0.0268609	15.6569	0.0230978	38.1794	0.0570512
			F17	15.8112	0.020329	15.2184	0.0196058	35.6617	0.0464825
			F19	17.2631	0.0193642	15.4705	0.017405	37.323	0.0421365
			F20	16.0502	0.0260202	15.2814	0.0248323	35.6905	0.0590675
			F22	16.6904	0.0188658	15.3785	0.0174052	36.3014	0.0416892
			F23	18.2248	0.026177	15.5907	0.022473	38.0239	0.0555899
			F24	15.9957	0.0452825	15.2894	0.0432911	35.5338	0.102468
			F25	16.9303	0.0240684	15.4446	0.0224406	36.4215	0.0527126
			F26	17.2015	0.0342028	15.3993	0.0308027	36.1649	0.0726741
			F27	16.3363	0.0464116	15.3132	0.0421513	35.7947	0.10068
			F28	16.1312	0.0300183	15.3046	0.028674	35.5334	0.0671709
			F29	16.5277	0.0420008	15.3821	0.0349317	36.0418	0.0860982
			F31	16.9043	0.0368485	15.3698	0.0334889	36.3376	0.0794603
			F32	17.5283	0.0307309	15.5387	0.0261491	37.1382	0.0649614
			F33	16.5667	0.0193848	15.3984	0.018016	36.5867	0.0432746
			F34	17.8023	0.0551699	15.4684	0.0478629	37.4661	0.118124
			F35	16.5294	0.0275939	15.3737	0.0254841	36.2989	0.061186
			F36	15.1607	0.0687268	15.047	0.0683963	34.7015	0.160988
			F37	17.2062	0.0285681	15.4727	0.0247432	36.6656	0.059887
Bandol-1	Upper Missisauga	2200	F6	18.181	0.0484655	15.4876	0.0414254	37.3829	0.0993216
			F7	18.2907	0.0421967	15.5496	0.0358096	37.8314	0.0875997
			F8	18.3085	0.0291308	15.5615	0.0222349	38.0164	0.0548538
			F9	18.0174	0.0640886	15.5032	0.0232397	37.9401	0.101804
			F10	18.2692	0.00771093	15.5873	0.00630997	38.0491	0.0154708
			F11	16.5502	0.025279	15.3228	0.0122087	36.0569	0.0375845
			F12	18.4241	0.0237586	15.5991	0.0175371	38.1622	0.0436922
			F13	18.3087	0.037985	15.5555	0.0299168	37.8848	0.0754267
			F14	15.8176	0.0076314	15.2414	0.00691305	35.8505	0.016352
Bandol-1	Middle Missisauga	2560	F1	18.6831	0.0783965	15.806	0.0672213	38.6478	0.165867
			F2	18.2235	0.0191693	15.6151	0.0165355	38.0424	0.0408544
			F3	18.2391	0.0237713	15.6178	0.0205301	38.0591	0.0503793
			F4	18.5244	0.0417652	15.6899	0.0346613	38.3269	0.0848894
			F5	18.2013	0.023041	15.6093	0.0195624	38.0214	0.0481125
			F6	17.925	0.013135	15.0236	0.00641555	36.2621	0.0165898
			F7	17.9442	0.0154543	15.2025	0.0126848	36.7279	0.0314773
			F13	18.2945	0.00640969	15.6247	0.00552775	38.1329	0.0131565
			F18	18.4944	0.0129639	15.6349	0.0112307	38.2885	0.0272258
			F19	18.2362	0.00636201	15.6365	0.00494843	38.0991	0.0117726
			F20	19.8254	0.0471082	15.6747	0.03009	40.6687	0.100725
Bandol-1	Mohican	2990	F1	17.3382	0.0115263	15.4938	0.0103673	36.6852	0.0246593
			F2	17.2067	0.0149611	15.4708	0.0132178	36.6498	0.0318363
			F3	17.7538	0.0212872	15.5278	0.0154666	36.9174	0.0446516
			F4	13.6976	0.0741385	14.5678	0.0756468	33.4616	0.175592
			F5	18.1434	0.0345682	15.5819	0.0279536	37.9368	0.0694836
			F11	18.3481	0.0147954	15.6602	0.0126276	38.6339	0.0311244
			F12	18.336	0.0111097	15.6525	0.00974526	38.1873	0.0236858
			F13	18.4297	0.0896321	15.6433	0.076945	38.2506	0.191781
			F14	20.4279	0.0329326	15.8319	0.0248112	44.4034	0.077999
			F15	18.2878	0.0255859	15.5988	0.0221727	38.059	0.0543679
			F16	17.007	0.0229777	15.4109	0.0206137	36.4029	0.04908
			F17	17.9479	0.0184087	15.5316	0.0143367	37.5642	0.035911
			F18	18.416	0.00920036	15.5687	0.00556725	38.1341	0.0164791
			F19	18.3568	0.0813537	15.5777	0.0692948	37.9073	0.169351
			F20	18.3036	0.0246668	15.6611	0.0206202	38.2014	0.0508305
Bandol-1	Mohican	3905	F1	12.4017	0.0106646	13.8882	0.0120097	32.2813	0.0277519
			F3	13.388	0.0187211	14.6373	0.0202205	33.1461	0.046408
			F4	18.0955	0.0450701	15.5327	0.03825	37.6312	0.0935978
			F5	18.5827	0.00756182	15.623	0.0065806	38.3817	0.0156876
			F6	15.7327	0.00924241	15.2559	0.00736499	35.1867	0.0176499
			F7	18.3035	0.0310318	15.4867	0.0260781	38.0932	0.06692
			F8	12.6171	0.0225234	14.0314	0.0220353	32.5179	0.0521208
			F10	13.9067	0.0402189	14.7381	0.039625	33.764	0.092615
			F11	18.112	0.0160248	15.4861	0.0135618	37.6868	0.0327951
			F12	18.5493	0.0678829	15.5443	0.0558844	38.373	0.142471
			F13	18.7799	0.0613189	15.6096	0.0463209	38.5042	0.120926
			F14	17.5379	0.0303153	15.5451	0.0275509	36.8432	0.0651352
			F15	18.6868	0.0605703	15.5254	0.0505026	38.4746	0.126671
			F16	18.7692	0.0483194	15.6185	0.0367384	38.7553	0.117606
			F17	18.4124	0.0265017	15.504	0.0208756	38.2084	0.0534068
			F18	18.2418	0.0161921	15.5821	0.0138969	38.0015	0.0340066
			F22	17.083	0.0484681	15.3611	0.0419799	36.486	0.101861
Putative Hinterland Sources
South Mountain Batholith	Meguma Terrane, Nova Scotia	44.79399, -64.48771	F1	18.1709	0.00544871	15.5959	0.00504347	38.0277	0.0117709
			F2	18.1652	0.0256536	15.5935	0.00959724	37.8258	0.0469108
			F3	18.1797	0.00682	15.6028	0.00624695	38.035	0.0146115
			P4	18.2226	0.0525337	15.6226	0.0455299	38.2091	0.116261
			F5	18.163	0.0108705	15.5848	0.00958743	37.987	0.0227427
			F6	18.1625	0.00788951	15.5866	0.00786204	37.9913	0.0172974
			F7	18.1728	0.0179954	15.564	0.0155673	37.9645	0.0373553
			F8	18.1612	0.00906694	15.5912	0.00786258	37.9985	0.0193394
			P9	18.187	0.0198205	15.604	0.017182	38.0404	0.0418214
			F11	18.3041	0.0302517	15.6002	0.0230514	38.1779	0.057937
			P14	18.2945	0.0294214	15.6233	0.0240852	38.2967	0.0627817
			P15	18.2056	0.0257754	15.6056	0.0218428	38.0538	0.0536945
			F16	18.1808	0.0089569	15.5974	0.00783422	38.0342	0.0189219
			F17	18.1735	0.0155092	15.5975	0.0134931	38.0127	0.032863
			F18	18.1597	0.0100732	15.583	0.00903157	37.9808	0.0217884
			F20	18.3062	0.0916864	15.6317	0.0768792	38.1921	0.191123
			F21	18.164	0.0224814	15.564	0.0195205	37.9688	0.0477353
			F22	18.3457	0.0782752	15.4672	0.0690604	37.889	0.169173
			F24	18.1453	0.0069728	15.5696	0.00618361	37.9654	0.0147071
			F25	18.1753	0.00653112	15.5941	0.00582608	38.0216	0.0136118
			F26	18.1869	0.0190611	15.6042	0.016555	37.9848	0.093535
			F28	18.4279	0.0834361	15.5571	0.0571673	38.1451	0.143278
			P29	18.1423	0.0275201	15.5878	0.0231991	38.0104	0.0570287
			F30	18.1752	0.00861654	15.5964	0.00756379	38.0217	0.0185972
			F31	18.1565	0.0106274	15.5836	0.00900321	37.9796	0.0223338
			F32	18.189	0.0112805	15.6075	0.00973563	38.0448	0.0237505
			F35	18.4575	0.0234226	15.6078	0.0173386	38.0781	0.042046
			F36	18.6802	0.0512935	15.6182	0.0100818	38.1727	0.02842
			F37	18.1454	0.0105554	15.5871	0.00897761	37.9895	0.0219457
			F38	18.144	0.00862997	15.5762	0.00742598	37.9671	0.0178309
			F39	18.4544	0.0213691	15.587	0.00801337	38.0804	0.0204443
			F40	18.1815	0.0114477	15.5992	0.00953294	38.0239	0.0234072
			F42	18.7655	0.0623651	15.6001	0.0250552	38.1544	0.0634088
			F43	18.1697	0.0115813	15.5827	0.00967142	37.9993	0.0242821
			F44	18.17	0.0350231	15.5347	0.0299124	37.921	0.0730061
			F45	18.3324	0.029599	15.6531	0.0241879	38.2363	0.0595407
			F46	18.2632	0.0319893	15.5788	0.026012	38.1482	0.0655644
			F49	18.2046	0.0134185	15.601	0.00793588	38.0559	0.0203044
			F50	18.1969	0.0134531	15.5959	0.0116089	38.0424	0.0284151
German Bank Pluton	Offshore Nova Scotia	43.35833, -66.48667	F1	17.7281	0.00676685	15.3903	0.0051598	37.8146	0.0122435
			F2	17.8587	0.0211865	15.4004	0.00498706	37.8517	0.011082
			F3	18.1005	0.0281179	15.4139	0.00590294	37.8462	0.0137434
			F4	17.9342	0.0413278	15.4089	0.0290301	37.7409	0.0720486
			F5	18.0289	0.0352435	15.4185	0.019661	37.804	0.0483038
			F6	17.7478	0.00587199	15.4154	0.00465381	37.84	0.0111277
			F7	17.7464	0.0168634	15.4102	0.0126649	37.7772	0.0311508
			F8	17.714	0.00732707	15.4108	0.00631605	37.8069	0.0158321
			F9	17.7934	0.016676	15.4198	0.0126966	37.8126	0.0303303
			F10	17.8898	0.0168458	15.4353	0.00946419	37.8558	0.0228934
			F12	17.6824	0.0103493	15.4384	0.00789153	37.8666	0.018951
			F13	17.7608	0.0107338	15.436	0.00580093	37.8886	0.0137478
			F14	18.4096	0.0409675	15.4679	0.0260624	37.8922	0.0616927
			F15	18.2715	0.0543525	15.4655	0.0193333	37.9081	0.0466624
			F16	17.7525	0.00646153	15.4258	0.00495528	37.8674	0.0116964
			F17	17.7363	0.00975666	15.4283	0.00590132	37.8617	0.0145557
			F18	17.7727	0.0070471	15.4274	0.00536941	37.851	0.0131835
			F19	17.7751	0.013384	15.428	0.00790602	37.8626	0.0178785
			F20	17.7743	0.0134376	15.4269	0.00793796	37.8588	0.0179512
			F21	17.7275	0.00714148	15.4246	0.00603011	37.8448	0.0139654
			F22	17.046	0.0498755	15.3767	0.0227508	37.7094	0.0559401
			F23	17.7548	0.00502685	15.4221	0.00410544	37.874	0.00957473
			F24	17.8127	0.0167864	15.4566	0.0126314	37.8947	0.0304204
			F25	17.7952	0.00731609	15.4358	0.00493696	37.8748	0.0116364
			F26	17.7552	0.00414843	15.4302	0.00298563	37.8996	0.00683322
			F27	17.7187	0.0056305	15.4364	0.00532515	37.8546	0.012449
			F28	17.7447	0.00802682	15.4324	0.00529071	37.8505	0.012594
			F29	17.7413	0.00609892	15.4436	0.0040063	37.894	0.00941599
			F30	17.6708	0.00516439	15.438	0.00373296	37.8951	0.00878916
Mallard M-45	Cretaceous Tarchytic Tuffs	2532.888-2663.952	F1	17.5842	0.087021	15.5627	0.069076	37.2577	0.172266
			F2	17.797	0.0807668	15.7235	0.0631237	38.2177	0.15295
			F3	18.5745	0.0573082	15.6297	0.0393396	38.3702	0.100894
			F4	18.4605	0.0618864	15.621	0.051986	38.5891	0.146334
			F5	18.6168	0.0447557	15.5894	0.036086	38.4742	0.0997564
			F6	18.5689	0.0581993	15.7033	0.0429102	38.5841	0.113258
			F8	18.4854	0.0549487	15.5711	0.0437583	38.3726	0.112407
			F9	18.4559	0.0503889	15.6167	0.0409972	38.3856	0.101732
			F10 PLAG	18.8503	0.0429302	15.6687	0.0350548	38.9242	0.0956362
			F11	18.3485	0.0711537	15.6314	0.0610314	38.2674	0.1499
			F12	19.4999	0.0274132	15.5736	0.033184	39.2992	0.066533
			F13	18.5213	0.0604302	15.672	0.0510208	38.4645	0.125821
			F14	18.4861	0.0485353	15.6831	0.0400179	38.4571	0.0993178
			F15	18.3463	0.0517225	15.5902	0.0438313	38.2108	0.107099
			F16	18.4273	0.05749	15.6254	0.0476139	38.6807	0.128642
			F17	18.4337	0.0492408	15.6593	0.0437651	38.537	0.118258
			F19	18.4689	0.0451998	15.6755	0.0381849	38.4243	0.0935989
			F20	18.1642	0.065486	15.5598	0.0531778	37.982	0.253915
			F21	18.336	0.0412992	15.594	0.0352258	37.6716	0.085078
			F22	18.4019	0.0593906	15.6208	0.050332	38.2341	0.123645
			F23	18.3307	0.0508655	15.5094	0.0401471	38.0862	0.100426
			F24	18.466	0.0604347	15.6035	0.0487142	38.3814	0.126418
			F25	18.373	0.0512256	15.6062	0.0440943	38.4458	0.125255
			F26	18.7281	0.0534722	15.7382	0.0435143	38.7954	0.106369
			F27	18.5408	0.0592923	15.744	0.0500497	37.57	0.65829
			F28	18.5492	0.0455747	15.6213	0.0380434	38.5275	0.101863
			F29	18.6792	0.0464266	15.6633	0.0351381	38.6605	0.0893383
			F30	18.4644	0.0638928	15.6779	0.0540027	38.4234	0.133544
			F31	18.3766	0.0606514	15.7008	0.0522017	38.4287	0.146192
			F32	18.6223	0.0726781	15.5921	0.0529523	38.2688	0.130252
			F33	18.3102	0.0498504	15.5189	0.0423935	38.0506	0.10482
			F34	18.3891	0.052504	15.5473	0.0423958	38.1464	0.105539
			F36	18.4479	0.0448787	15.6457	0.0389572	38.321	0.0950938
			F37	18.4329	0.0475634	15.6097	0.040476	38.2871	0.100172
			F38	18.437	0.0614817	15.6122	0.0517417	38.275	0.128181
			F39	18.4461	0.0577727	15.6136	0.0489136	38.2965	0.12196
			F40	18.5411	0.0476563	15.6543	0.0392882	38.4962	0.0987565
			F41	18.5434	0.0625981	15.7207	0.0518497	38.5141	0.127721
			F42	18.4273	0.0618271	15.6045	0.0524346	38.3008	0.130085
			F43	18.6096	0.0568199	15.7552	0.0488804	38.6606	0.120486
			F44	18.9107	0.031605	15.6553	0.0235679	38.9248	0.0628949
			F45	18.4705	0.0981064	15.7088	0.0822492	38.2661	0.202569
			F46	18.4435	0.0497792	15.6094	0.0406195	38.3428	0.104369
			F47	18.6515	0.0565472	15.6685	0.0420484	38.8797	0.135383
			F48	18.615	0.0659736	15.6825	0.0506094	38.8457	0.164952
			F49	18.3695	0.0575351	15.6415	0.045712	38.2412	0.116745
			F50	18.8713	0.0624784	15.8213	0.0516362	39.5178	0.303921
Note: F = K-feldspar, P, PLAG = plagioclase.
